# Supplementary material for: Regulation of mitochondrial complex III activity and assembly by TRAP1 in cancer cells
Source: Springer Nature journal article supplement (doi:10.1186/s12935-022-02788-4), 2022-12-12
Supplement: MOESM2 [file 23816228]

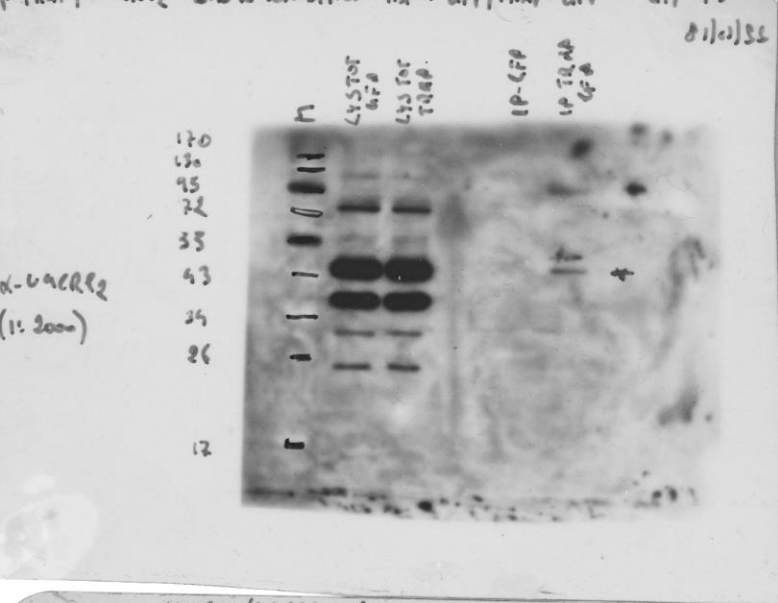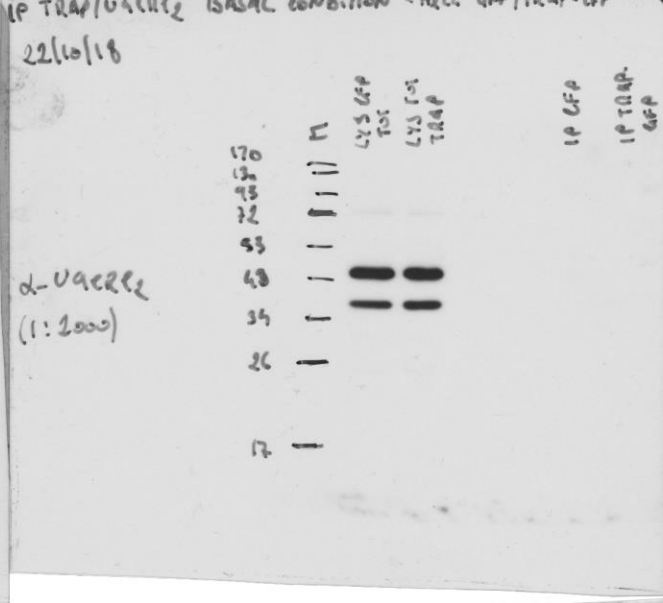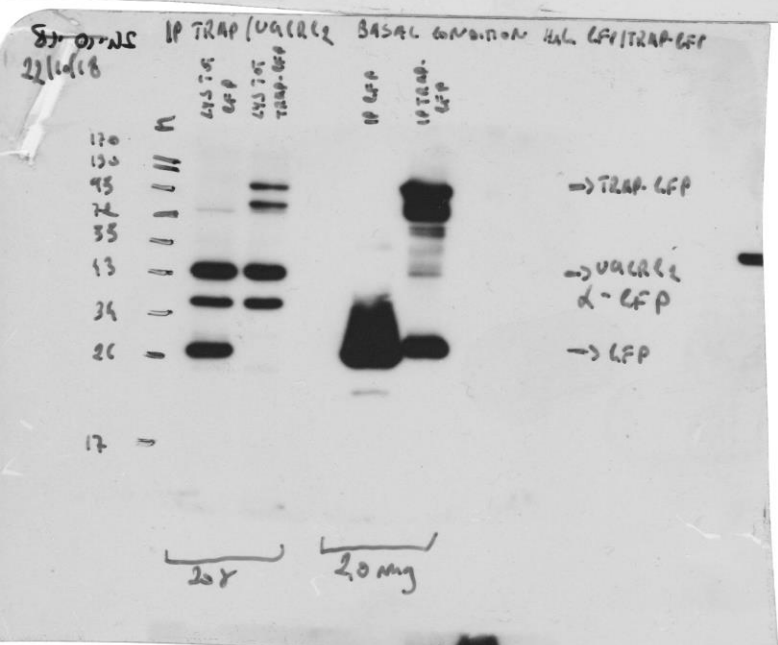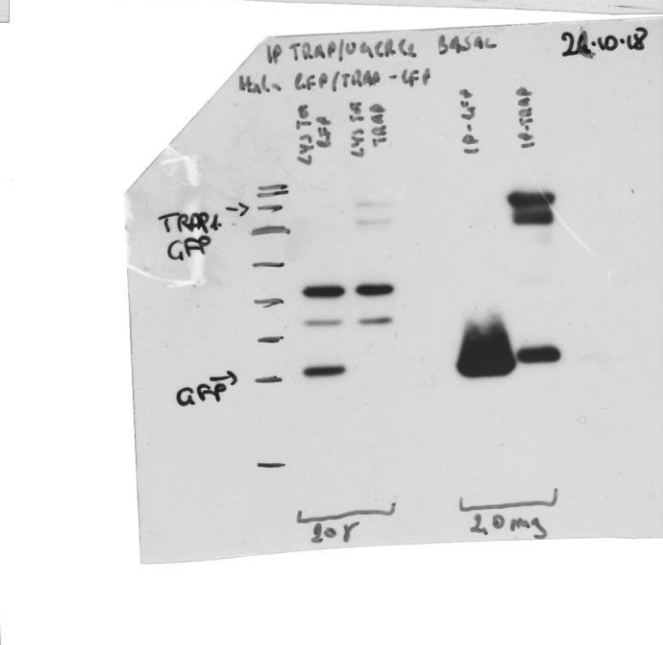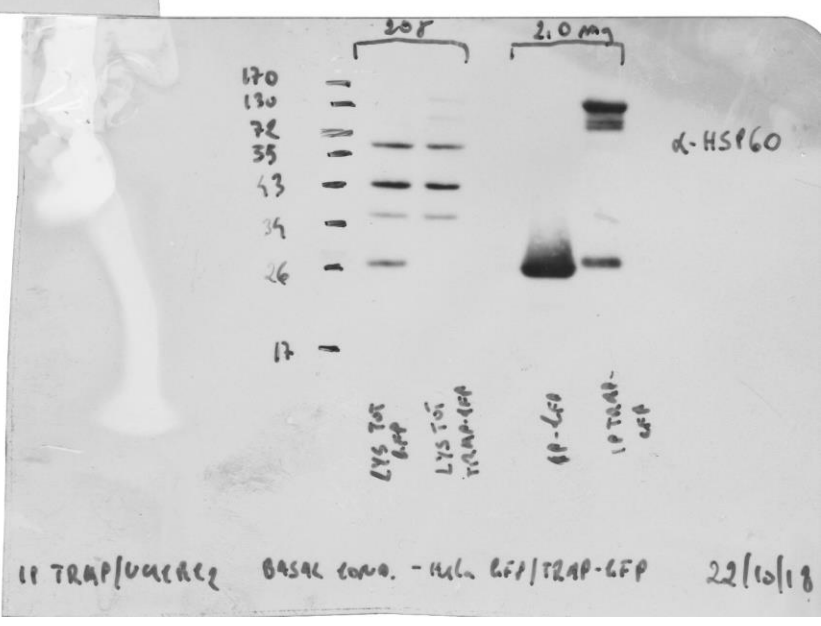

Figure 1 Panel A (left)

Figure 1 Panel A (right)

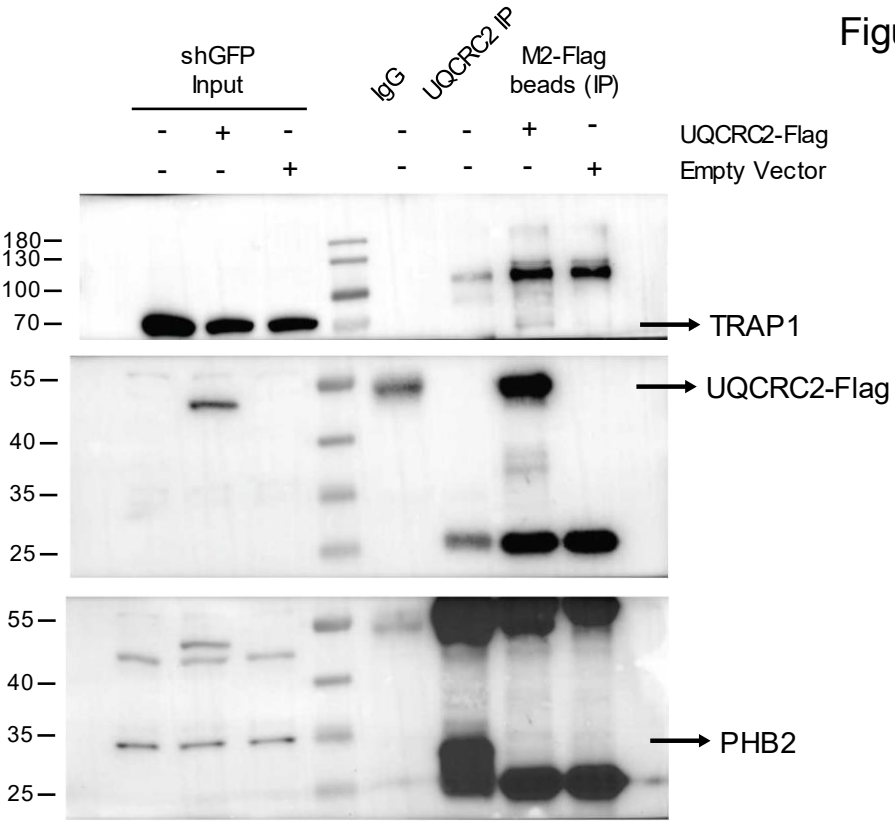

Supplementary Figure 1 Panel A

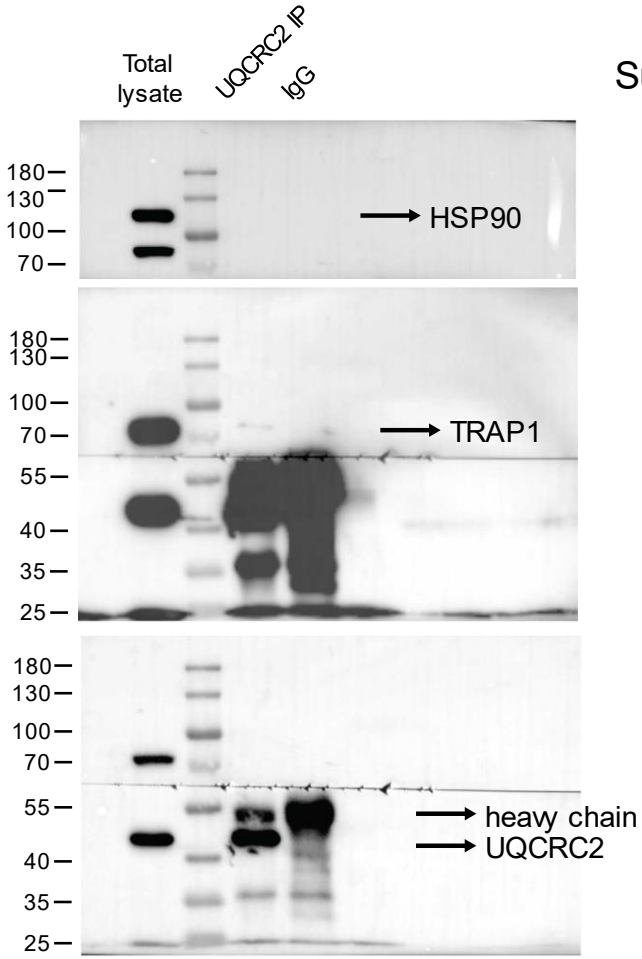

GFP TRAP1-GFP  
GFP TRAP1-GFP  
GFP TRAP1-GFP  
GFP TRAP1-GFP

Figure 1 Panel H (right)

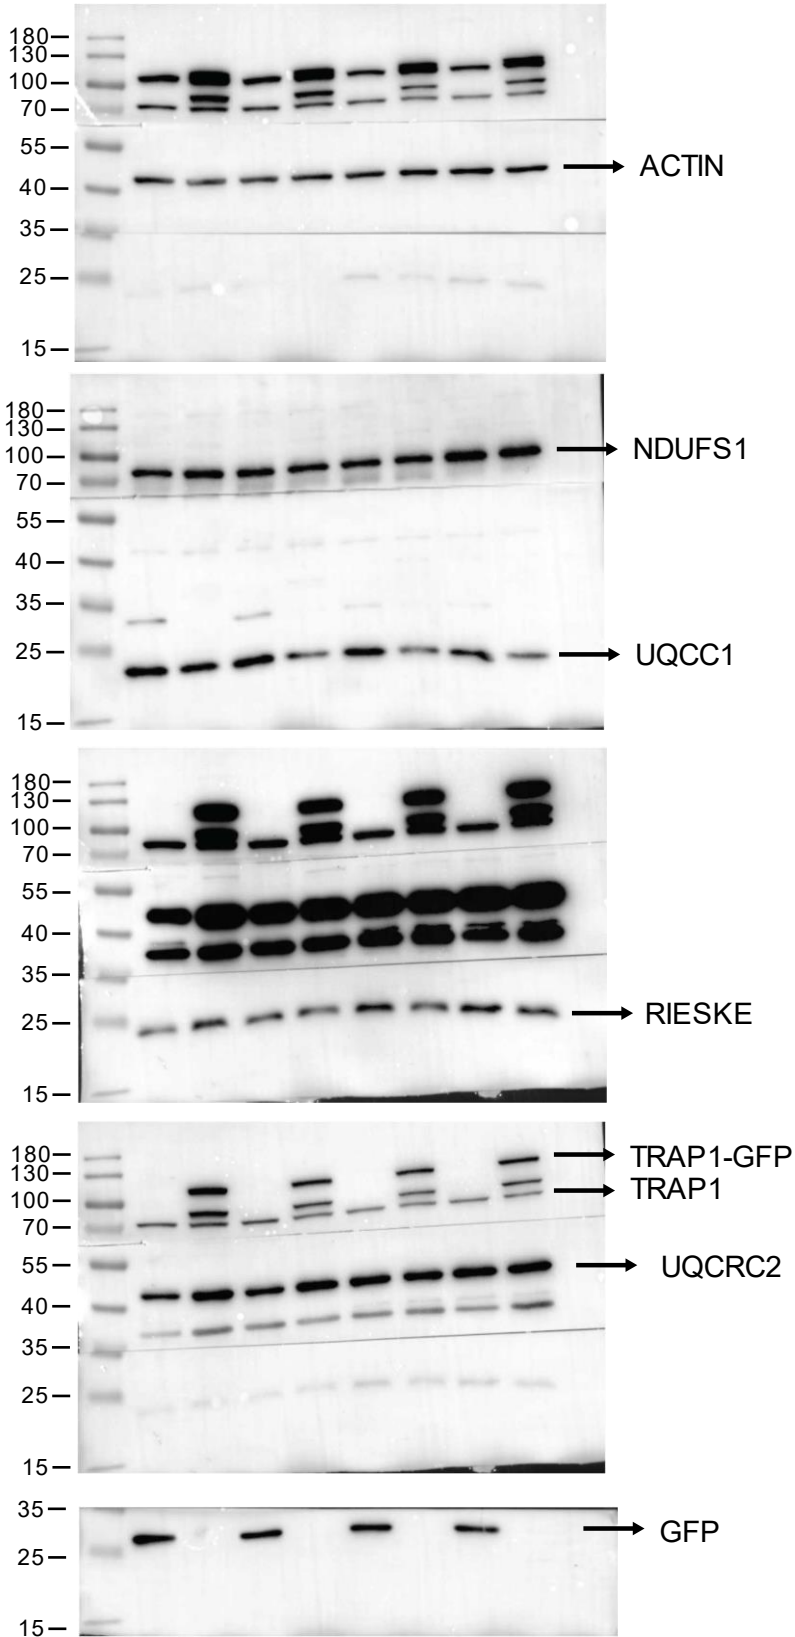

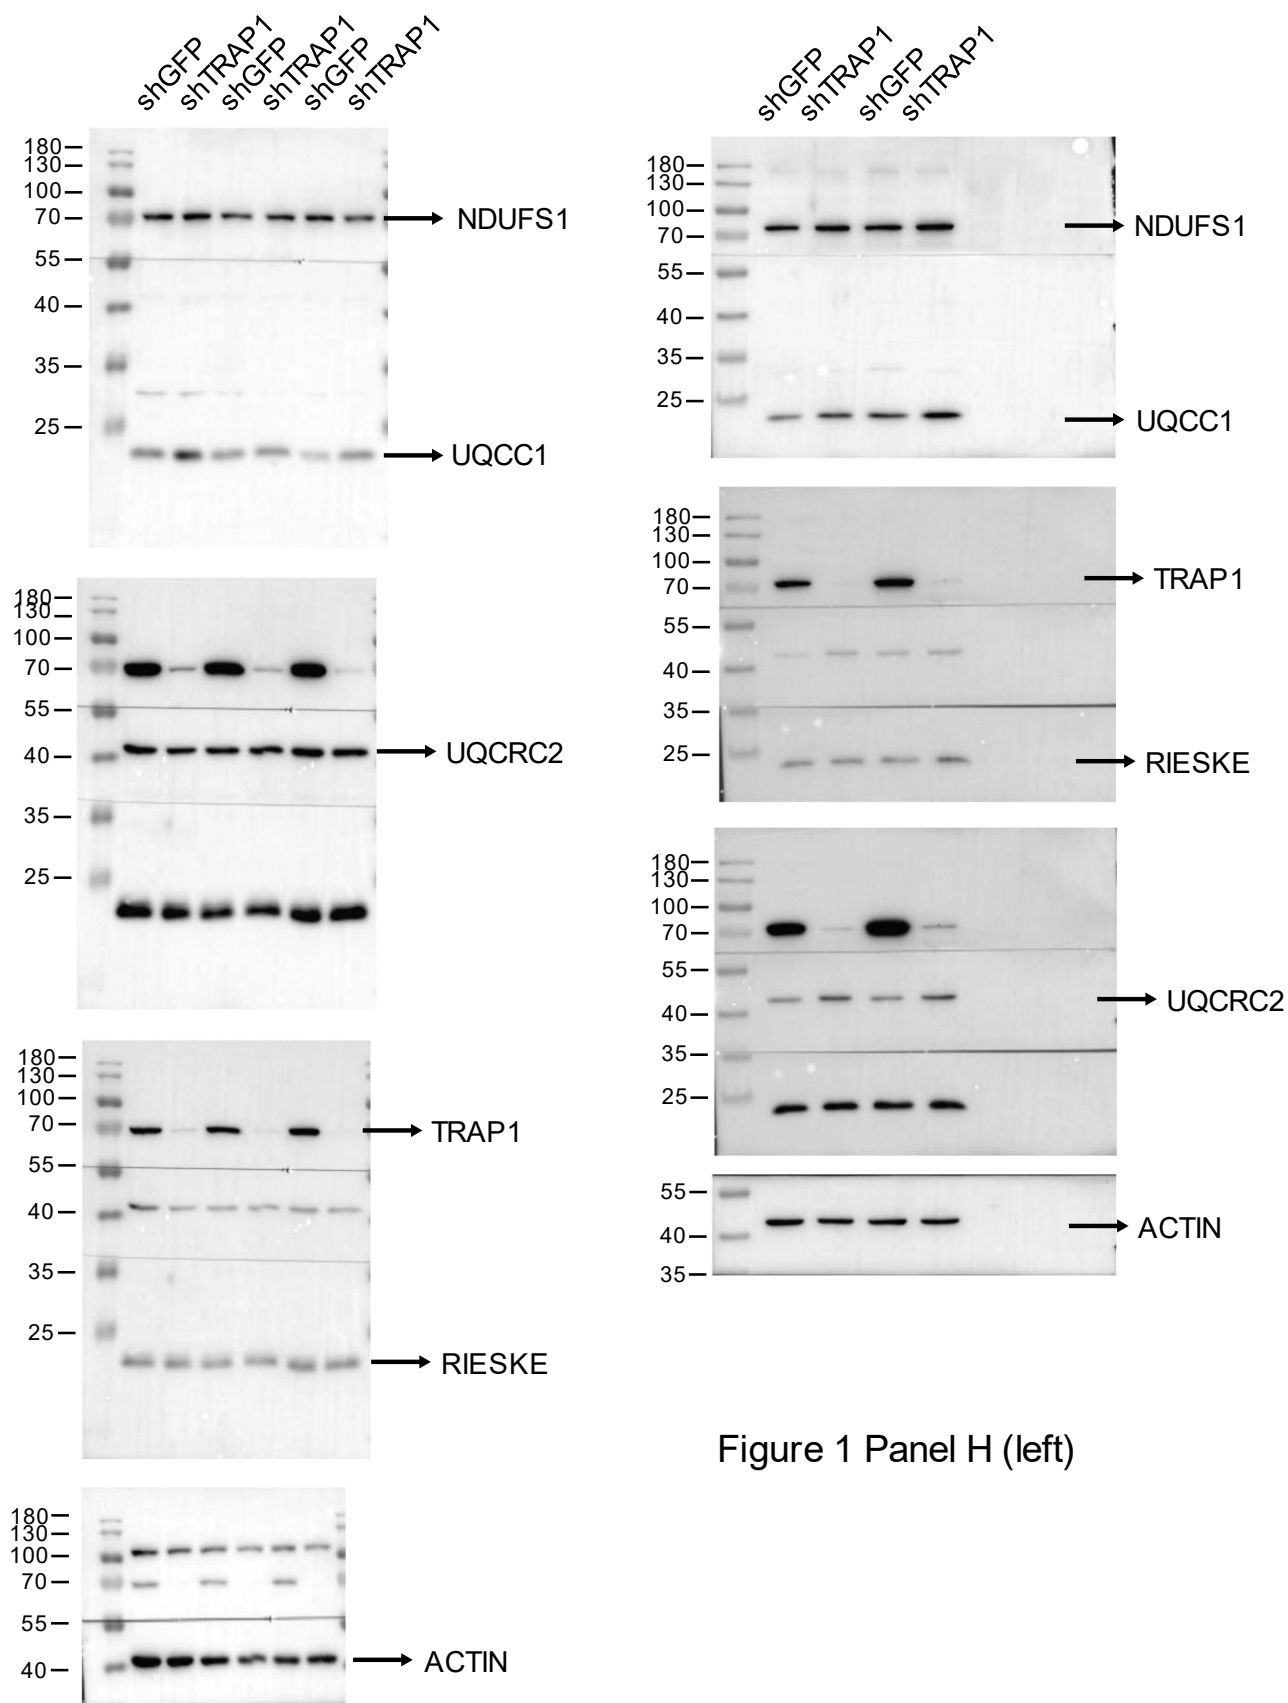

## Supplementary Figure 2

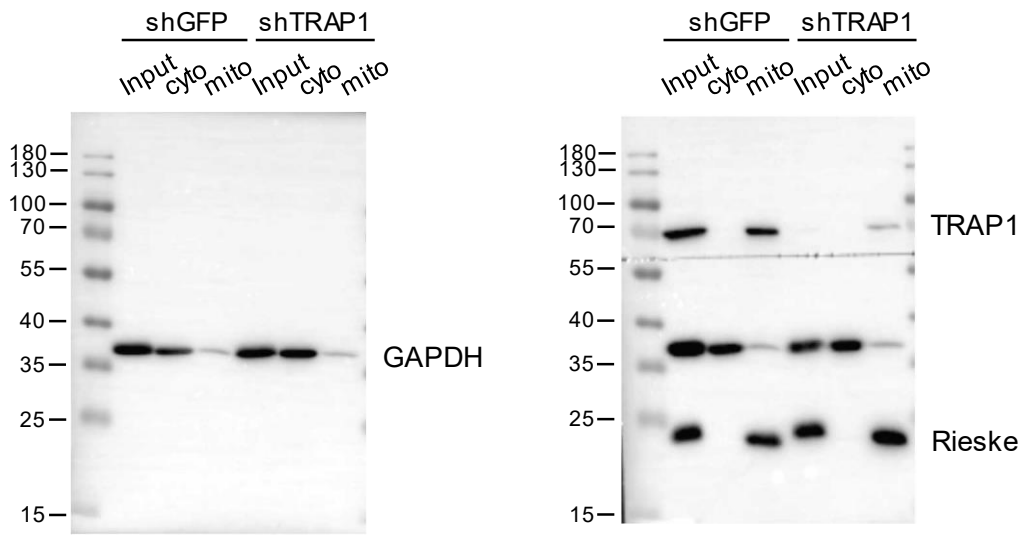

Figure 2 Panel E

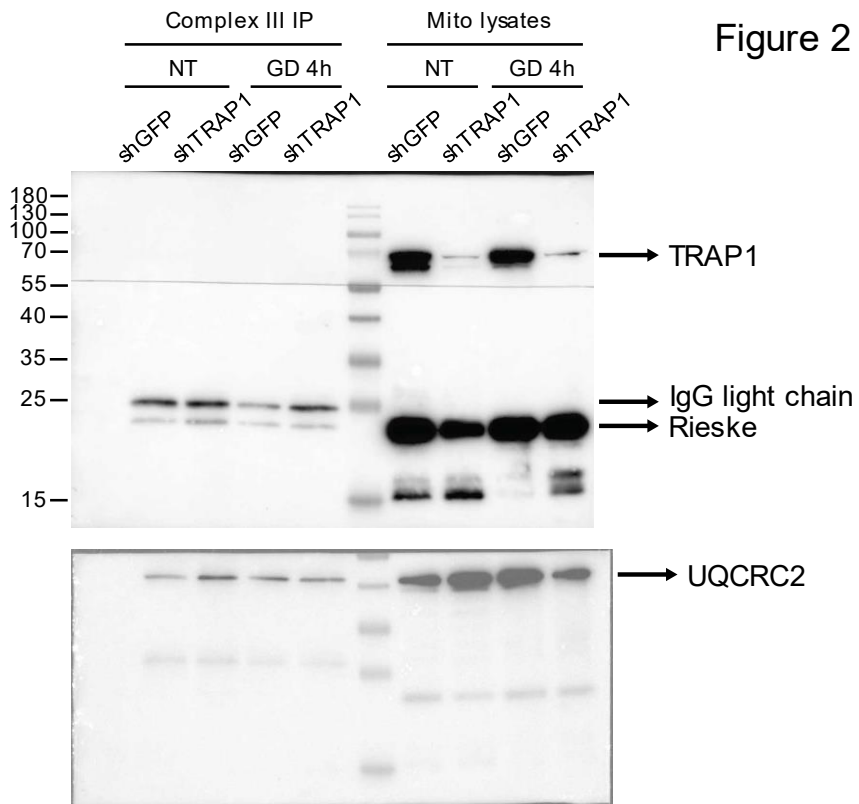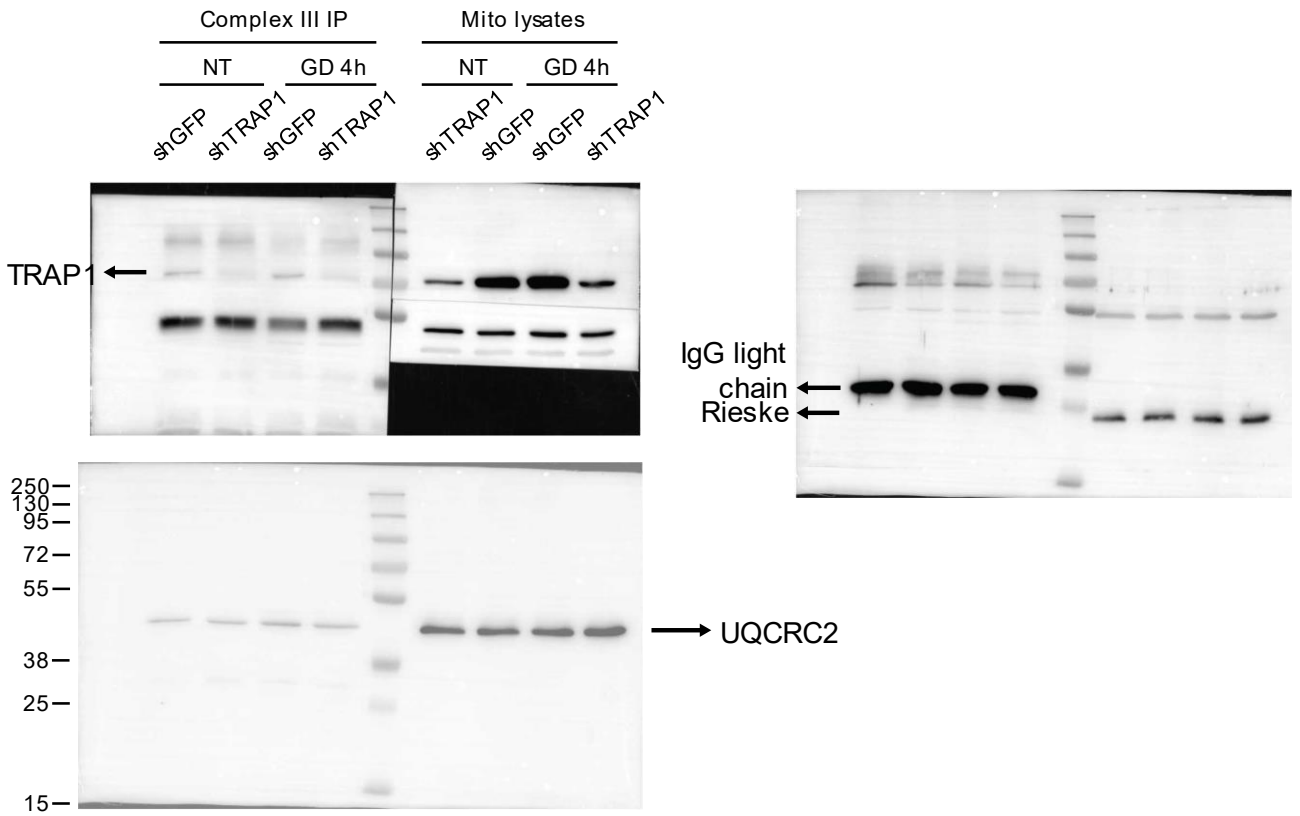

Figure 2 Panel F

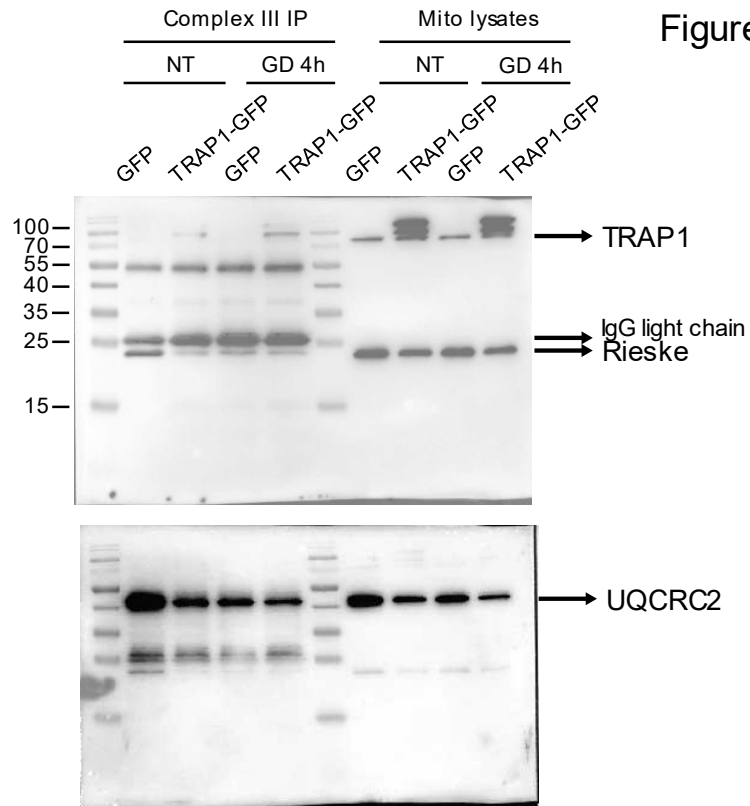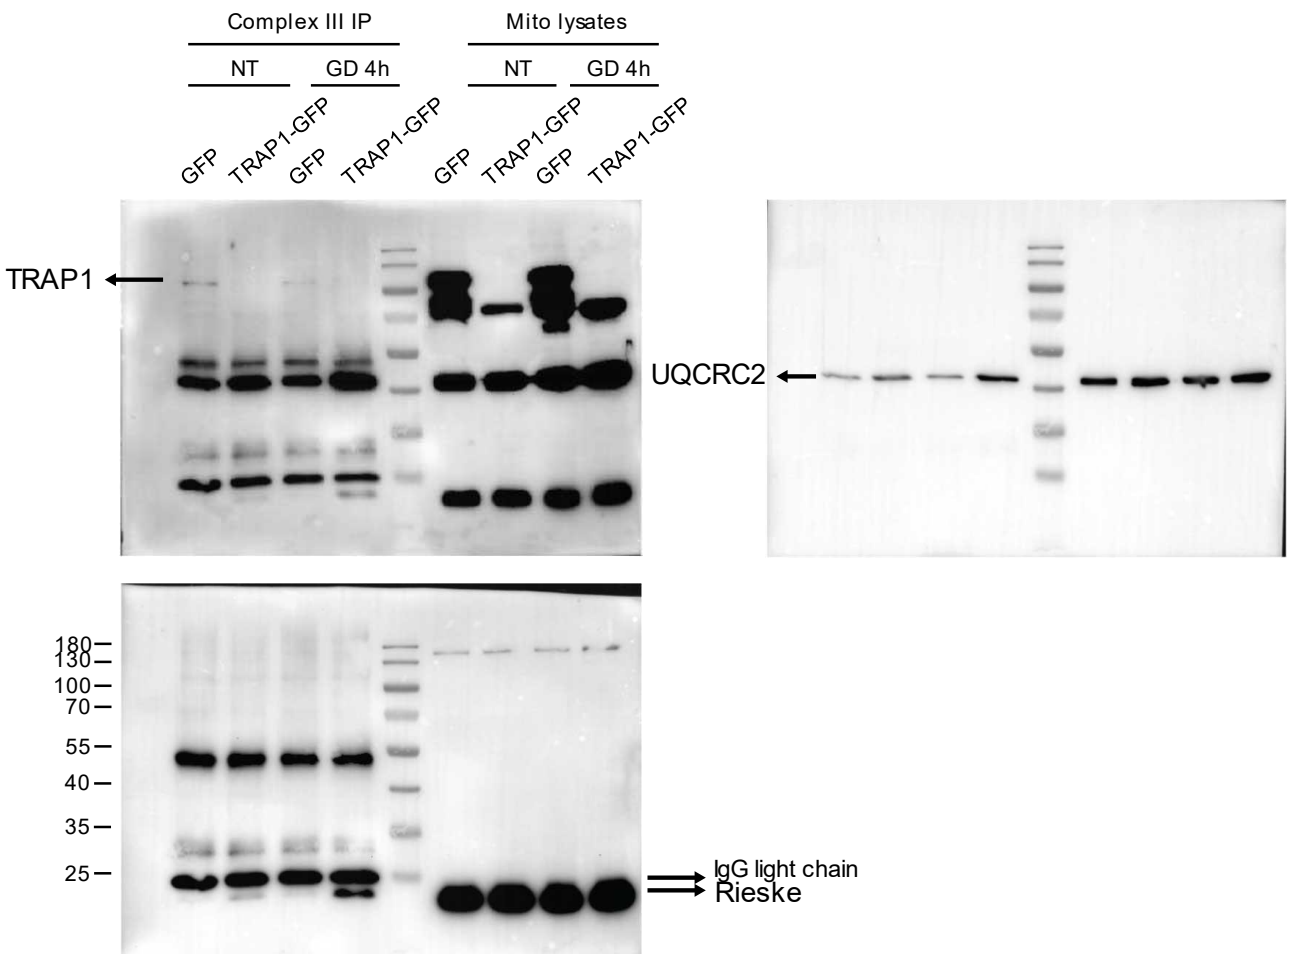

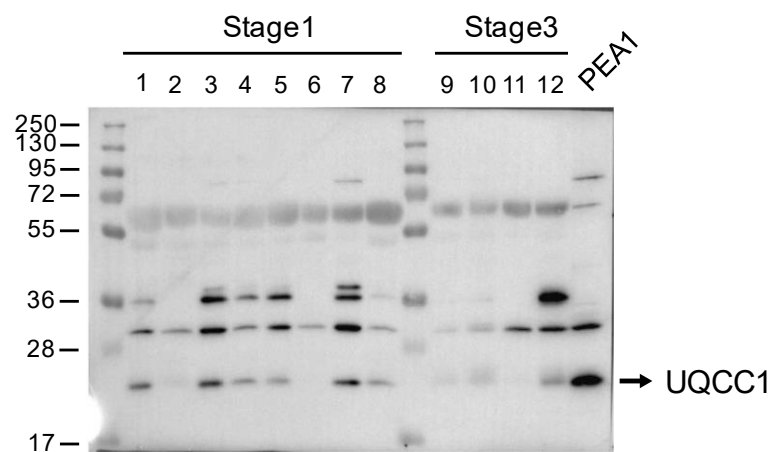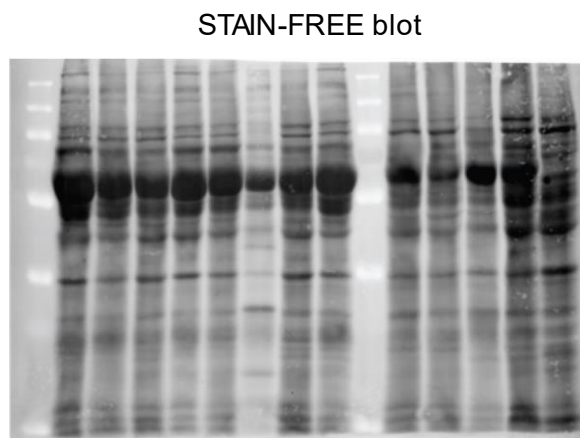

Sample 6 was discarded from the analyses

Figure 4 Panel E-F

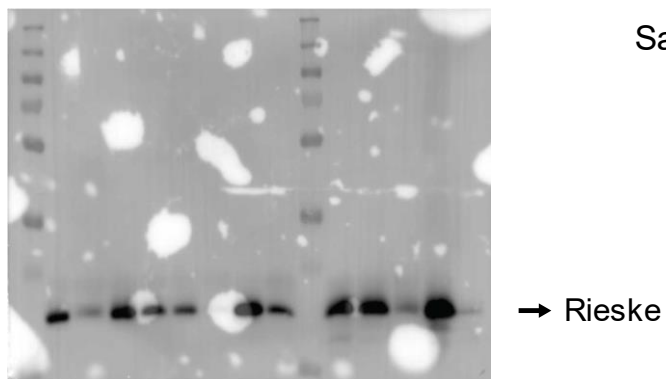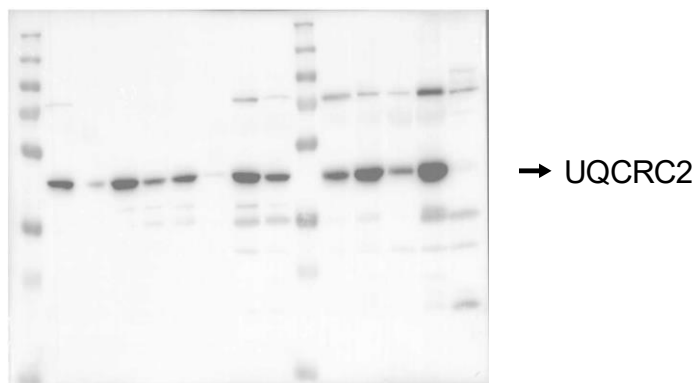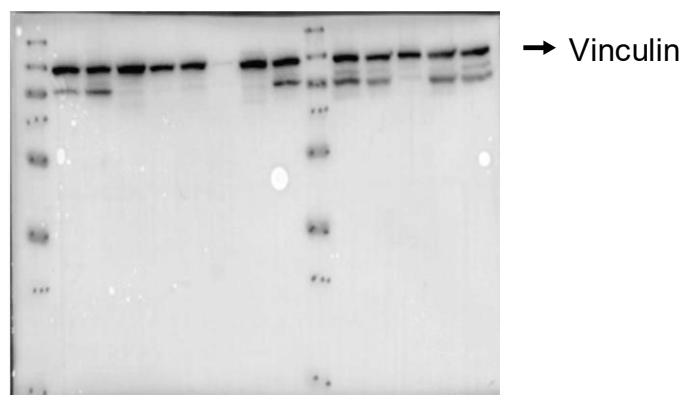



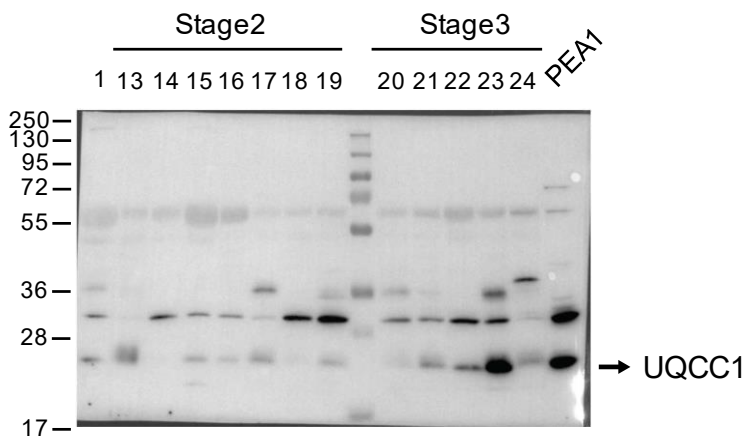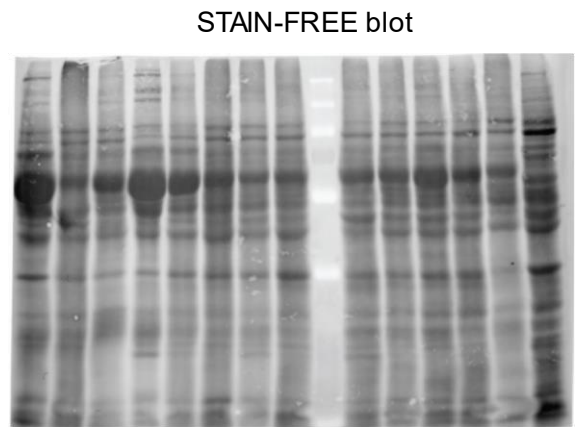

Sample 13 was discarded from the analyses

Figure 4 Panel E-F

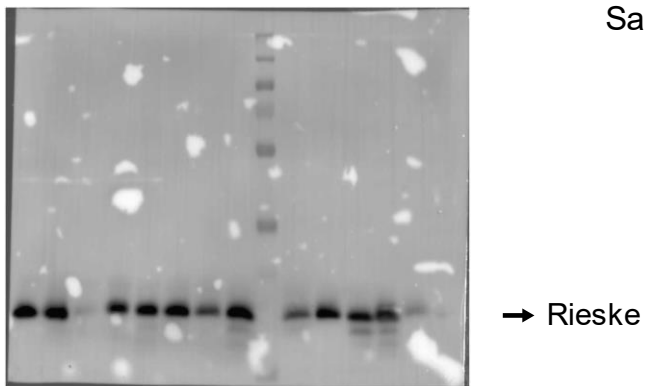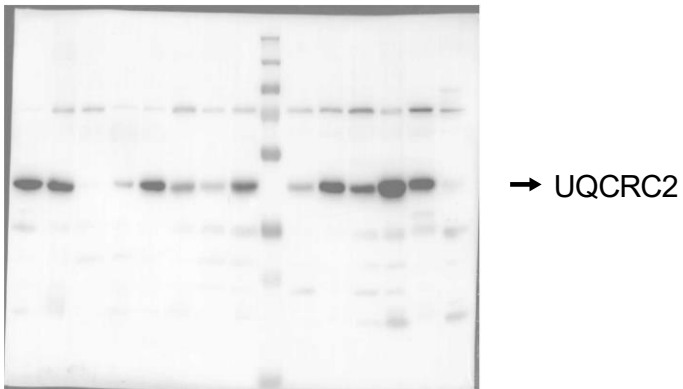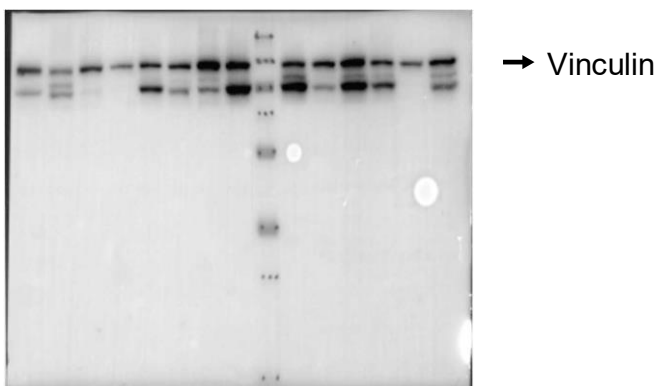

Stage3

1 25 26 27 28 29 30 31 32 33 34 35 36

PEA1

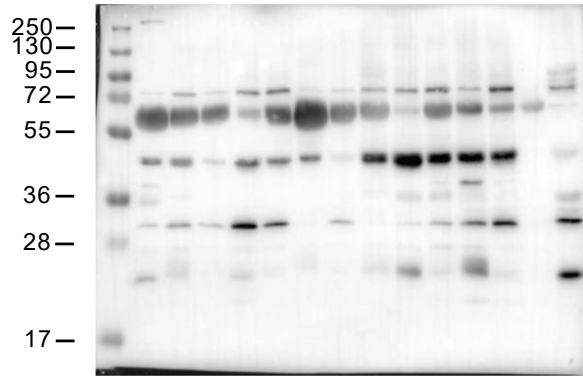

→ UQC1

STAIN-FREE blot

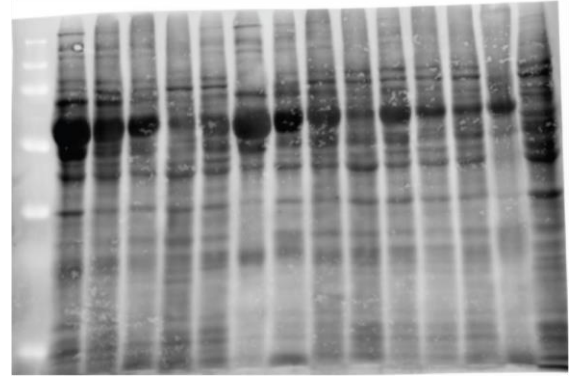

Samples 29 and 36 were discarded from the analyses

Figure 4 Panel E-F

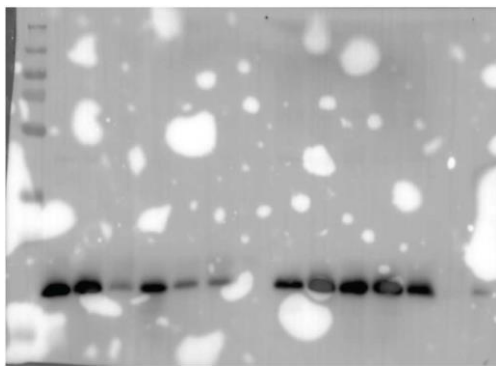

→ Rieske

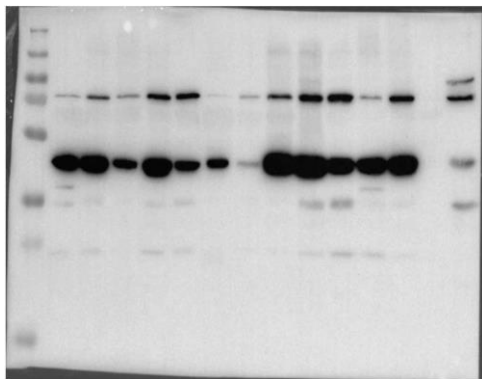

→ UQCRC2

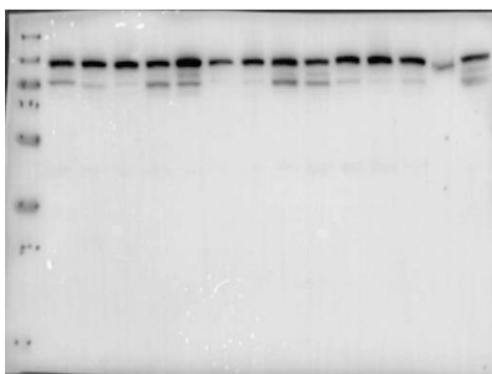

→ Vinculin

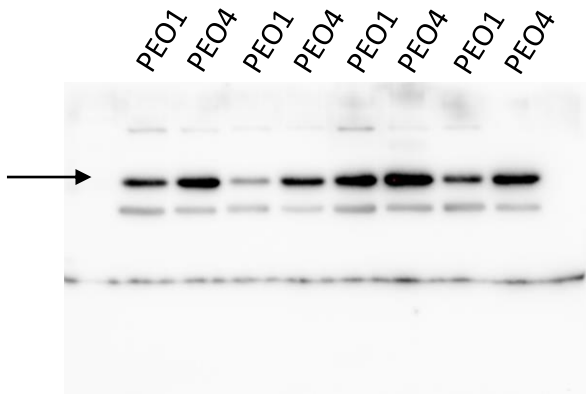

**UQCRC2**

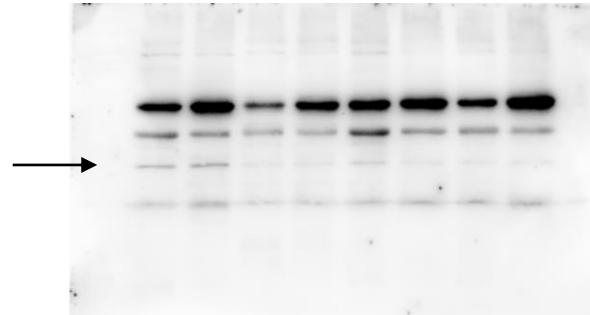

**UQCC1**

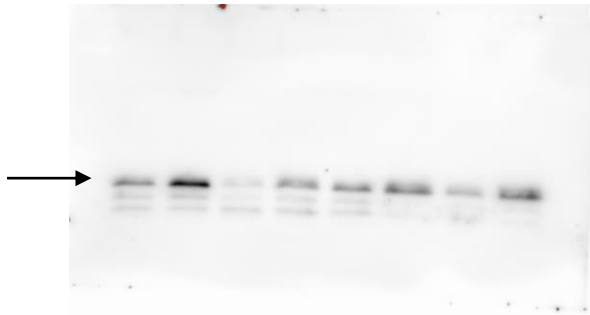

**RIESKE**

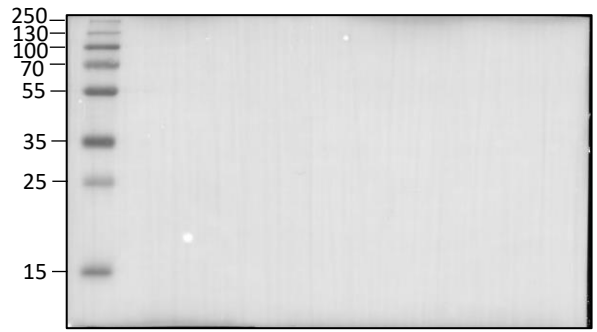

**Membrane (colorimetric)**

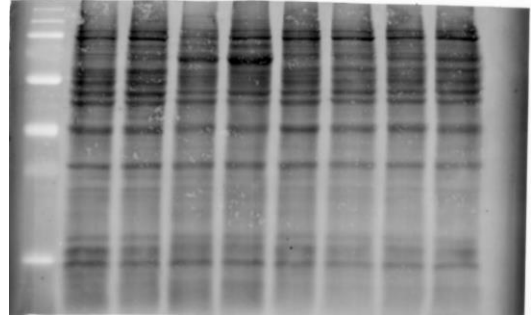

**Total protein Stain**

Figure 6 Panel A – left side

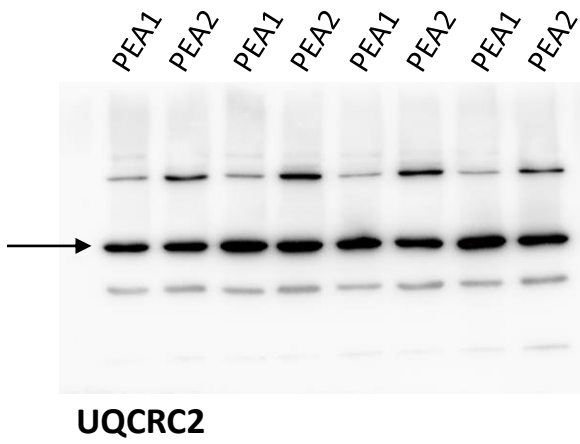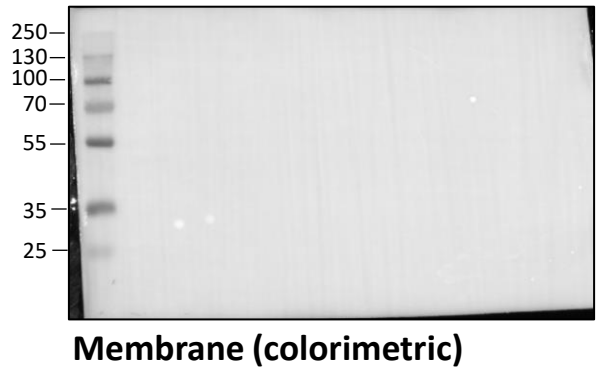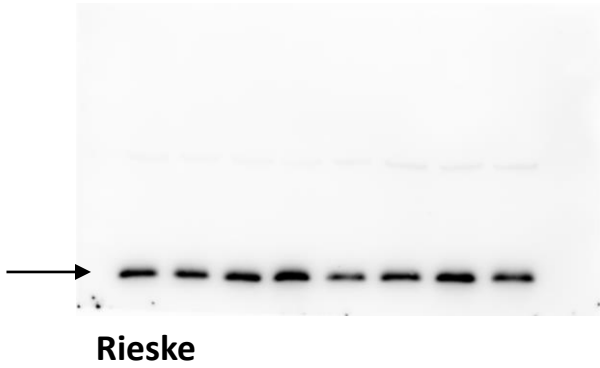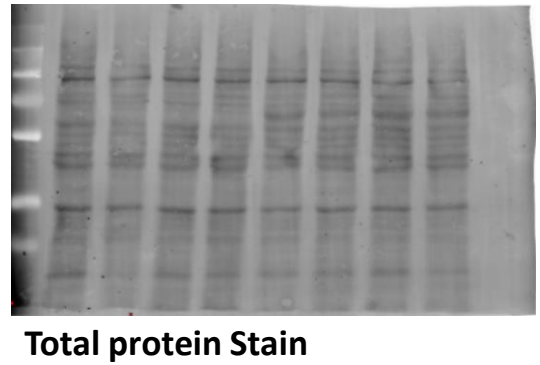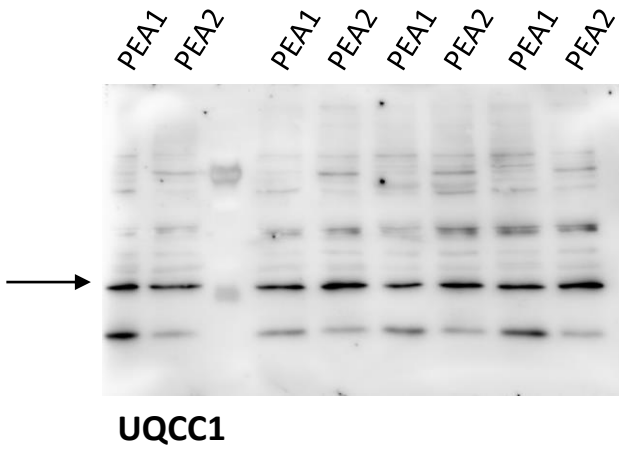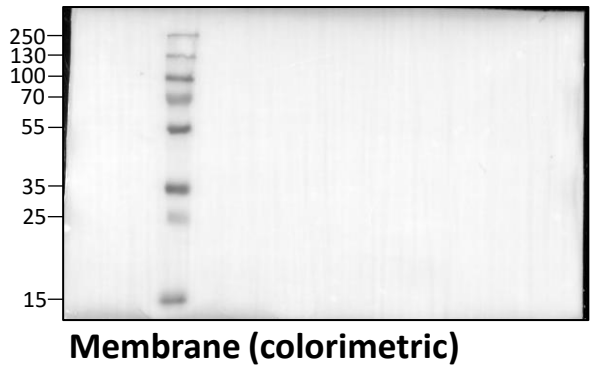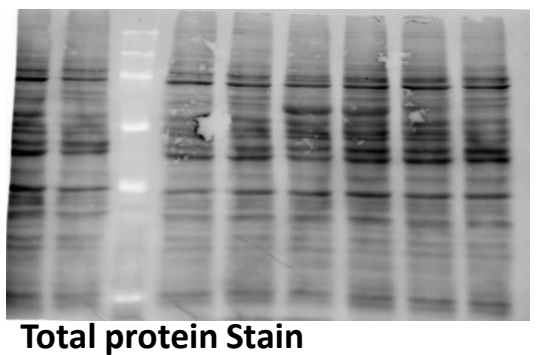

Figure 6 Panel A – right side
